# Supplementary material for: Design and validation of Segment - freely available software for cardiovascular image analysis
Source: Springer Nature journal article supplement (doi:10.1186/1471-2342-10-1), 2010-01-11

True ROI area versus pixel based area

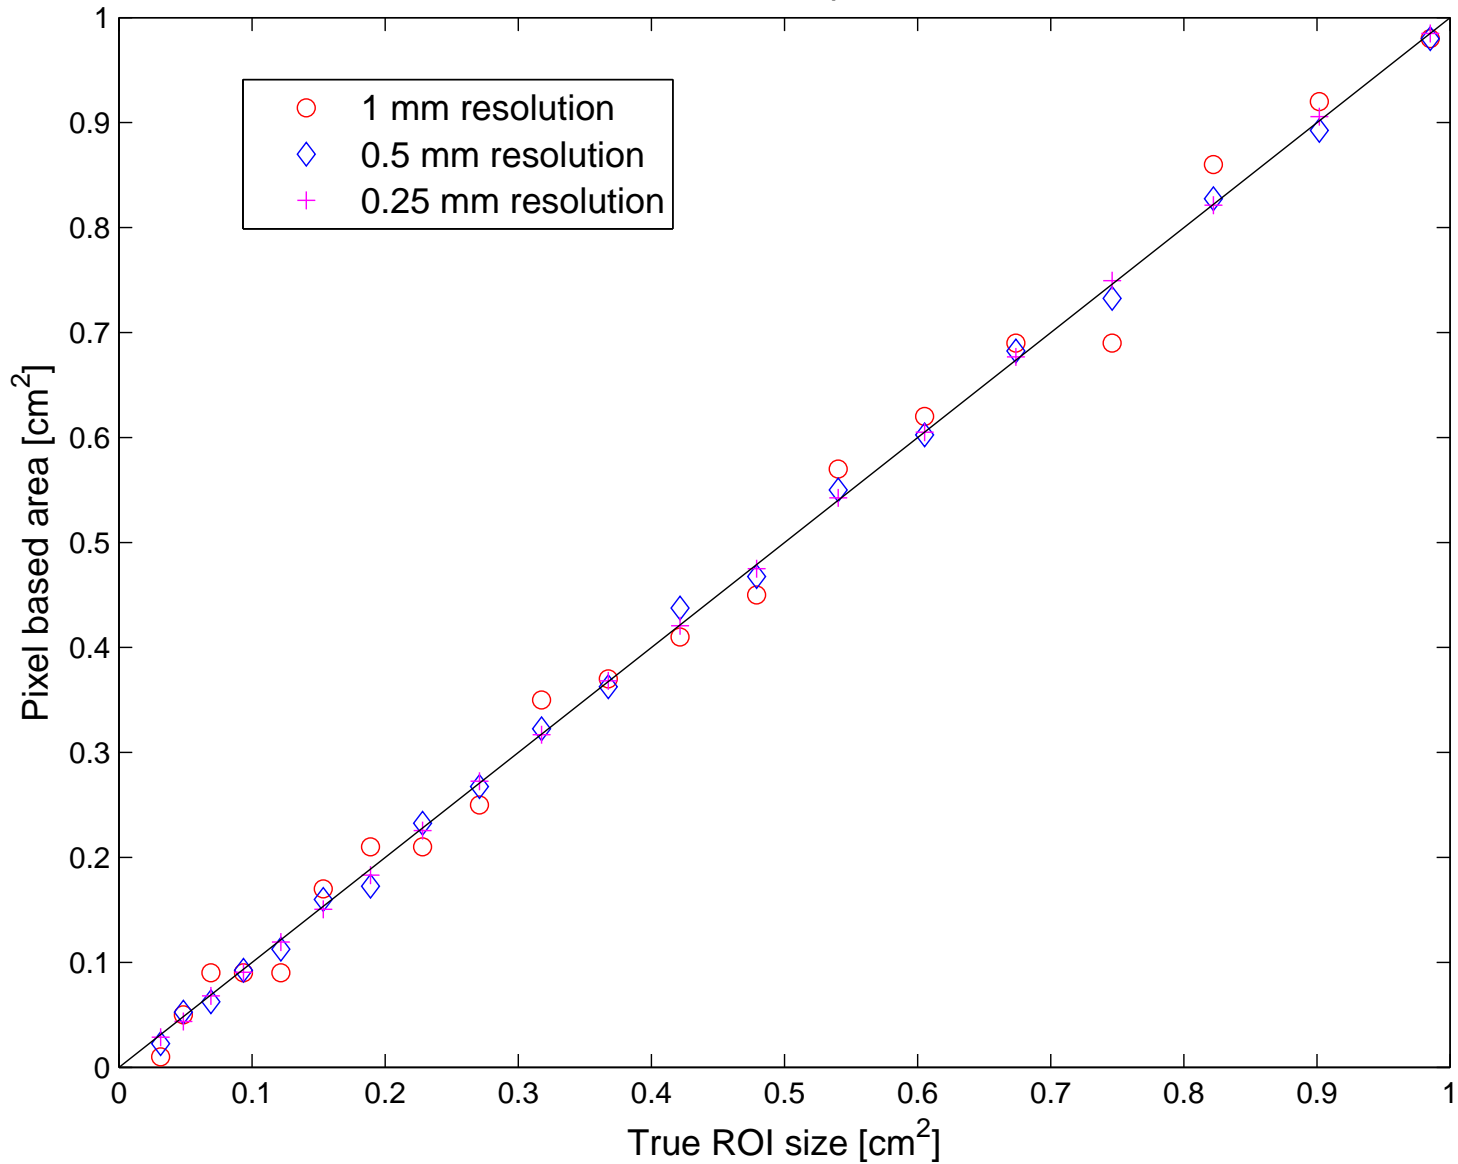

Supplement: 12880_2009_78_MOESM6_ESM.pdf [file 12880_2009_78_MOESM6_ESM.pdf]
